# Supplementary material
Source: ML conference proceedings conference paper supplement (https://aclanthology.org/D16-1049)
Supplement: Attachment [file otani2016IRT_supp.pdf › supplementary_material/otani2016IRT_supp.pdf]

# IRT-based Aggregation Model of Crowdsourced Pairwise Comparisons for Evaluating Machine Translations: Appendix

Naoki Otani<sup>1</sup>    Toshiaki Nakazawa<sup>2</sup>    Daisuke Kawahara<sup>1</sup>    Sadao Kurohashi<sup>1</sup>

<sup>1</sup>Graduate School of Informatics, Kyoto University, Yoshida-honmachi, Sakyo-ku, Kyoto, Japan

<sup>2</sup>Japan Science and Technology Agency, Kawaguchi-shi, Saitama, Japan

otani.naoki.65v@st.kyoto-u.ac.jp    nakazawa@pa.jst.jp    {dk,kuro}@i.kyoto-u.ac.jp

## Abstract

This document complements the main paper “IRT-based Aggregation Model of Crowdsourced Pairwise Comparisons for Evaluating Machine Translations”. We follow the same notations presented in the main paper.

## A Generative Judgment Model

The generative probability of judgment  $u_{i,j,k}$  is defined as the difference in the BCC, that is,

$$\begin{aligned} P_{jkc}(\theta_i) &= P(u_{i,j,k} = c | \theta_i, b_j, a_k) \\ &= P_{jkc-1}^*(\theta_i) - P_{jkc}^*(\theta_i). \end{aligned}$$

Thus, they can be written as,

$$\begin{aligned} P(u_{i,j,k} = 1 | \theta_i, b_j, a_k) &= 1 - \frac{1}{1 + \exp(-a_k(\theta_i - b_{j1}))} \\ P(u_{i,j,k} = 2 | \theta_i, b_j, a_k) &= \frac{1}{1 + \exp(-a_k(\theta_i - b_{j1}))} \\ &\quad - \frac{1}{1 + \exp(-a_k(\theta_i - b_{j2}))} \\ P(u_{i,j,k} = 3 | \theta_i, b_j, a_k) &= \frac{1}{1 + \exp(-a_k(\theta_i - b_{j2}))}. \end{aligned}$$

## B Parameter Estimation

We find the values of the parameters to maximize the log likelihood based on obtained judgments  $U$ .

$$\mathcal{L}(\theta, \xi) = \log P(U, \theta, \xi)$$

## B.1 Marginal Likelihood Maximization of Judge Sensitivity and Matchup Difficulty

We first estimate the parameters  $\xi$  to maximize the marginal log likelihood w.r.t. the system performance  $\theta$ .

$$\begin{aligned} m\mathcal{L}(\xi) &= \log P(U, \xi) \\ &= \sum_{i \in \mathcal{I}} \log \int_{-\infty}^{\infty} P(\theta) P(U_i | \theta, \xi) d\theta + \log P(\xi). \end{aligned}$$

The equation above can be approximated using Gauss-Hermite quadrature, i.e.,

$$\begin{aligned} m\mathcal{L}(\xi) &\approx \sum_{i \in \mathcal{I}} \log \sum_{t=1}^T \frac{1}{\sqrt{\pi}} w_t P(U_i | \tau x_t, \xi) + \log P(\xi) \\ w_t &= \frac{2^{T-1} T! \sqrt{\pi}}{T^2 (H(x_t))^2} \\ H(x_t) &= \left( 2x_t - \frac{d}{dx_t} \right)^{T-1} \cdot 1, \end{aligned}$$

where  $x_t$  and  $w_t$  were precomputed as shown in Table 1.

We solve the optimization problem using the gradient descent methods to maximize the approximated marginal likelihood.

$$\begin{aligned} \frac{\partial}{\partial a_k} m\mathcal{L} &= \sum_{i \in \mathcal{I}} (\tilde{P}(U_i | \xi))^{-1} \sum_{t=1}^T \frac{1}{\sqrt{\pi}} w_t \frac{\partial}{\partial a_k} P(U_i | \tau x_t, \xi) \\ &\quad + \frac{\partial}{\partial a_k} \log P(a_k) \\ &= \sum_{i \in \mathcal{I}} \sum_{t=1}^T W_{it} \frac{\partial}{\partial a_k} \log P(U_i | \tau x_t, \xi) + \frac{\partial}{\partial a_k} \log P(a_k), \end{aligned}$$

| $t$ | $x_t$         | $w_t$             |
|-----|---------------|-------------------|
| 1   | -5.5503518730 | 3.7203650700E-014 |
| 2   | -4.7739923430 | 8.8186112000E-011 |
| 3   | -4.1219955470 | 2.5712301800E-008 |
| 4   | -3.5319728770 | 2.1718848980E-006 |
| 5   | -2.9799912080 | 0.0000747840      |
| 6   | -2.4535521250 | 0.0012549820      |
| 7   | -1.9449629490 | 0.0114140658      |
| 8   | -1.4489342510 | 0.0601796467      |
| 9   | -0.9614996344 | 0.1921203241      |
| 10  | -0.4794507071 | 0.3816690740      |
| 11  | 0.0000000000  | 0.4790237031      |
| 12  | 0.4794507071  | 0.3816690740      |
| 13  | 0.9614996344  | 0.1921203241      |
| 14  | 1.4489342510  | 0.0601796467      |
| 15  | 1.9449629490  | 0.0114140658      |
| 16  | 2.4535521250  | 0.0012549820      |
| 17  | 2.9799912080  | 0.0000747840      |
| 18  | 3.5319728770  | 2.1718848980E-006 |
| 19  | 4.1219955470  | 2.5712301800E-008 |
| 20  | 4.7739923430  | 8.8186112000E-011 |
| 21  | 5.5503518730  | 3.7203650700E-014 |

Table 1: Values of  $x_t$  and  $t_t$  used in the Gauss-Hermite quadrature.

where

$$\begin{aligned}
\tilde{\mathbf{P}}(U_i|\xi) &= \sum_{t=1}^T \frac{1}{\sqrt{\pi}} w_t \mathbf{P}(U_i|\tau x_t, \xi). \\
W_{it} &= \frac{w_t \mathbf{P}(U_i, \xi|\tau x_t) / \sqrt{\pi}}{\tilde{\mathbf{P}}(U_i, \xi)} \\
&= \frac{w_t \mathbf{P}(U_i|\tau x_t, \xi)}{\sum_{t'=1}^T w_{t'} \mathbf{P}(U_i|\tau x_{t'}, \xi)}.
\end{aligned}$$

In the same way,

$$\begin{aligned}
\frac{\partial}{\partial b_{jc}} m\mathcal{L} &= \sum_{i \in \mathcal{I}} \sum_{t=1}^T W_{it} \frac{\partial}{\partial b_{jc}} \log \mathbf{P}(U_i|\tau x_t, \xi) \\
&\quad + \frac{\partial}{\partial b_{jc}} \mathbf{P}(b_{jc}). \quad (c = 1, 2)
\end{aligned}$$

The inequality constraints on the parameters are handled by adding log barrier functions to the objective function.

## B.2 Maximum A Posteriori (MAP) Estimation of System Performance

Given the estimates of  $\xi$ , we estimate the system performance  $\theta$  by using MAP estimation. We maximize the objective function,

$$\begin{aligned}
\mathcal{L}(\theta) &= \log \mathbf{P}(U, \theta; \xi) \\
&= \sum_{i \in \mathcal{I}} \log \mathbf{P}(\theta) + \sum_{i \in \mathcal{I}} \log \mathbf{P}(U|\theta; \xi).
\end{aligned}$$

The estimates of  $\theta$  are obtained using the gradient descent method. The gradient for parameter  $\theta_i$  ( $i \in \mathcal{I}$ ) is

$$\begin{aligned}
\frac{\partial \mathcal{L}}{\partial \theta_i} &= -\frac{2\theta_i}{\tau^2} + \sum_{j \in \mathcal{J}} \sum_{k \in \mathcal{K}} \sum_{c \in \mathcal{C}} \frac{u_{i,j,k,c}}{\mathbf{P}_{jkc}(\theta_i)} \frac{\partial}{\partial \theta_i} \mathbf{P}_{jkc}(\theta_i) \\
&= -\frac{2\theta_i}{\tau^2} + \sum_{j,k,c} \frac{u_{i,j,k,c}}{\mathbf{P}_{jkc}(\theta_i)} a_k (\mathbf{P}_{jkc}^* \mathbf{Q}_{jkc}^* - \mathbf{P}_{jkc+1}^* \mathbf{Q}_{jkc+1}^*),
\end{aligned}$$

where  $Q^* = 1 - P^*$ .
